# Supplementary material for: Assessment of Wild Rocket (Diplotaxis tenuifolia (L.) DC.) Germplasm Accessions by NGS Identified SSR and SNP Markers
Source: MDPI journal article supplement (doi:10.3390/plants11243482), 2022-12-12
Supplement: s1 [file s1]

**Table SM2 .** Sequences of the analyzed SSR and SNP loci. The sequences used for primer design are underscored and highlighted in bold. The microsatellite sequences are in italic.

## SSR Loci

### MT317577

TTAGAAAAAATAACGATATTTTAGATAAAATATTGAGTATTTTGAAAATTATCAAATTGT  
TAGAATGATTTAGATAAAAAGAGTTCAGATAGATAGGATTGTTTTGGATATTT**CGGATAAA**  
**CATATCCGCTT**ACTTTTCAGGATTGATGATTGATAATTTTTTAAAAATATTTTCGAAGACTTTT  
AATAGATTTTAAATTATATATATATATATATATATATATTTGGCTATGCTATGTATATAATTAAT  
ATTTGGGTTTTAGTGATTTAACTCCCACTATTTTTAAATCGGAAGAAAAAC(C)TCCAACATA  
AAATTTTATGTTTTTAAACCTTGAACCTATTAA**ACCGTTAGTGATGTTAACCTCCGTTAAAA**  
AATTTCGTTTTTCTAAACAGACATCCGTTAAATTGAAACGCGGTGTTTCATATAATCACATAA  
AGGACACGCAATGTTTATAATCAACAAATATTTTAGTGATTTAAACCTCTAACTATTTTTAA  
TAGGATG

### MT317527

TGATGAACAAAAAATTCACCATAATTTTTTCGTAAACATGGTGTAGCAGTCGTTGTTAA  
TTGCCTTTACGAAAGATACTTTATTTCCACGGTTTATGAAATGACCAGATAAGTCCGATATAT  
ATAGTCGGATCAAACATTTTAGAATATTTCTATTTACATGATCTGTACAACATAGTCAGGAA  
TGGAGAAGGAAAATGAGAATAAATCCCACTGCTATTATCTGATATGAGATAATTAGTCACT  
AAGATCATATCAGAGGGTCAACCCGCGTG**ACTTTGACGAAACGAAGCCCGTGTGTGTGTGT**  
**GTGTGTGTGTGT**GAGTGAAGCTGGTTAGGGTTTTGTCAGAAGGCTCGACAGAGTGTATTAGTC  
GTGGTCAAGTTAGAAGAGTGTGCTGTTCAATGGGGCTGCTGCTTGTGGGACTACAGATTCT  
**GCTTCTCTTTGGTTCTGAG**ATCCTCACGTTGGAGATTGCAACCACTAGCACATCTACCACA  
CCGCTCTCATCTTCTT

### MT317537

GATGAAGGTTCCGAGAACTAACCAGCTTGGTGTCAAAACCAAAGATGGGTTATACTATAAA  
TTCCTGCTTTCGTGACCAGGTTTGTGTTTTGCAGACAAGATTCCTTTGTCTTTGCTTGAAG  
CTTATGTGTGTGTTCTTTTGGTGGTGTAAATAGGATGTTGCGAGCCTGACAAGTTTTTCCAAA  
GTGCGTTTGGGAAAACACCTGAAGAGAAA**CAGCTTCTGTTAGTGGTCCGGAATTGGGGAG**  
AAGTGGATTGAATGGTGTGTGTGTGTGTGTGTGTGTGCTTCGCATTTAAGCTTCTTATGT  
GGATAAAGGTCTTAGCTTTATTTCTTTTTTGTGTTGTGTGTGTGTGAAGGGAATAA**TCTGACGT**  
**TTTTGGTTGG**GGGAAAGCAAGCTTTTGAGGTGTCTCTGGCTGATGTTTCACAGACTCAGCTT  
CAAGGGAAAAATGATGTTTTGTTGGAGTTTCATGTTGATGACACTGCTGGTGCCAATGAGGT  
ATGATATTGTATGT

### MT317610

TTAGTGATTATGCTAGGTTGAAACGGTTTTTAAAAGTAAATTGCAGGTTTGTGAGAAATGGTA  
ATTTGCTCGATTGAATCGGTTTTGGTATTAACAATAAGGAAAGGTAGTTAGATTAAAGATT  
ACTATTCAGATAATCAGGATTATAATGCTATATATGCCTAATAAGTTGCATGCATGATATTA  
AAAAGATTGAAATATGCTAATATGTCCTCGCGTTTTAGACTC**GTCTATTGATCTGATGCCG**  
AAAATATCGATCGATGTTTTGACAGCGATATCGATATATATATATATATATATATATATTTGTCTGTC  
GATCGGTTACTCTATACGAGTATCGATCGATATAGCTCAGATCGAGTTGATGTGGATGCTCA  
CCAAGAT**TCATAGATCGGTTCTCGC**GTATCCCTAGAGGATCTTAGCGTATGCAAGATGATGT  
TAGGATGATGATTAAACGAGTTAATTCAATCCAAGATCATATTCTAGTTTGCTACTCTAGGATA  
AACATTAGAGTTCA

### MT317823

CTCTTATTGCACCTTTTCACGCCCTGAATATTAACACAATGATGTTAAAGATCCTTCCACTTAT  
CACTCAGATGAAAAACAAATGCTAAAACATAACCTTAAGTGGAATCCCAAGCATATTACA  
GCTGAGACTCTGATATCTTCACTCACGGCTACCATGCAACTTACTCTGCAGAAGCATAAGAT  
CACAT**CCAACATAGAAAGGTGCG**TAACAGAACAACGTGCGAGAGAGAGAGAGAGAGAGAGA  
GAGAGAGAGATCTACCTGGAACCCATTGATTTGCCAGCCAGTATCAAAGGATGACCAGGGAA  
TCTAGCAGCAGTTTCTTTTCAAAAATCCAGATGAAATTCAGTAAGTTTTT**CAGCTTTTGGAG**  
**GAACTC**TTCTTTTCCCTCCAACAATATCTACCCACCCAGAAATTTCCACAAATTAATGAA

TCCCCAATAAGTTTCTATCAAGAACACGAATATTATTATTAATAAATAATCTAGAATTTTCA  
CAGACATGGGTAATCAA

## SNP Loci

### DiploTSNP.045

TCTTTTCACTCGAGAATGATCCATTTGTTAGTAGACTTTCTATTAACCATTATAAATATTGTA  
TATAATGTCTTCTTTTGAGCACAGTCCCATGATTAGATATGGTTGTATATGTCTAATTAATT  
TTTCTTCTCCATCGTCTCAGTGTAATAGATATGCTTGCCTTACTTGGTGGAAATATGAATGGA  
CTATGGTTCCTGAATGTTCAATTTCCGAGCCTACAACTTTC(G/T)AAAGGAAGTTATACTTTG  
GAGAACCAGAAAGAGAGATCTCGTGGTTTATATCTTGGAAAACGCTTGCTACTTAAAGA  
CTGTAAACAATCTCGGTGAGAGACTGTAATGATGTTCAAACTTAAGATGATCAAAGAGTT  
GGCACTTTCTTCTCGAACTTCAACTGCATGTCAACTCATATTCGAATAATCTTATGTTTATAT  
TTTTATGATTTGAACTTTGCTTCTATATGTATCCGA

### DiploTSNP.062

TACTTTATCAAAAACAGAAAATGTTTGGGAAAATACATGTGAGTTTTTTTCGAAAGACATTCA  
ATATAAGGAAACATTATAATAGACCATGTAACCTTATCTCAAATTTTTTTTCTTTGGTTCTATA  
TGCGTTTGAATGGTTTCTGGAAAATTTTAGGTATAACCATGACTATGTTGGTTTATAGGATTA  
TGTCTAAGTGATG(T/C)CGAAAAAAGAAGGAGCCTTACTGAAAATCAAATAATTTTTTGAGAA  
GTAATGGAACCTTCATTAGATAATTGGACATCAATGCTTAAAGCCTTCTGCAACTTTAATGAC  
TCTAAAAATGTTTTGATCATGAATGAGCTGAGTTATAACCAAAAAGAGTTTAGGGAAGAAA  
ATGATAGAGACATCTTAAAATGACGGATGAGCAAAGGAAGATATACAAAGAAATTATTG  
ATGATGTTTTAGAAAAAGAAGGGTGTATTTCGTTTAT

### DiploTSNP.090

TTGATGAATGATCAAAACGTATTTTATTGAGAGAAGTAACATACAAACATGCGTATAGAACT  
GACTCTTAACGAAGACTATCATCTGTACGTGTTCCCTGGGACATCTTTCATGTCACTGTCACGG  
TGCACTCTGTGCCTGATCTCCAGTGATTTTCAGACACTGCCTGTTCCCTTGCCTTTTC(G/T)ATA  
CCTTGAGCGCTTGAGAAGAGCTCTACAGGCTCAGACTCTGCGATCTTGCCTCCTTCAAGTGG  
TGTCCTCATGTTTGTATCTCACTCGTATAGCCTCGTCTTCAGACTGCTTCGCTTGAGCTGTTGC  
GTAGTTTATGTCGTCTTTGTTCTTTGCCATCTTTAGGGTTTAATGAATCACGACTTGACATG  
GGACCGTATATAAACAGAGTTAGGTTCTTCGTGTACGCTCTGGACTCTCGTGTGTGCTTAC  
TTCTCTTTGTTGTGTGTTCTCTTTTGTGACAC

### DiploTSNP.138

AAATAGCATTTACTCTCTTTAACCTAGTACCTTCGATGTACACATTATATAAATACTAGTTGT  
ATTGCTTCTTCAATAATAAGAAACACATTACATTTACATGGTATCAAGAGCCTTGTAACAG  
ATCCAAAAATTTTCTTCTCTCTTCTTCTCACTACACACCAACTCCATTCATCATGTCTACGA  
CCTCTGCTGAAACAG(G/T)CGACACAAATCCACAAACCCTCCTCAATCTGAACATGACAAAC  
GTCACGAAACTAACCTCCAGCAACTACATGATGTGGAGCCTCCAAGTTCAAGCTCTCCTTGA  
CGGCTATGATCTCAGCAGCCACCTTGACAACCTCCACTCCACCACCGCCACCAACCATAACCA  
CTGACGGAAACCAACAGTCACAAACCCAGAGTTTCGCCCTCTGGAAACGTCAAGACCGGCTAA  
TCTTTAGCGGTCTCATCGGAGCCATCTCAGTTCCCA

### DiploTSNP.213

GAATCCCCTACTGTCTAAGCACCGTCTACTTCTCATTTCCATTTGAACAGCAAATTGGACAAT  
ACTTAACCTGAATTCACCGCGAGATGGCATCCTACTCTTTCTCGGCCTACCTGGTGGGCGG  
CGTGTTGCTGGCGGGAAGAGCAACCCATTGTCTCCTTCCACACCCATCTTAATTGATGTTATG  
TTGGTGTGGTCAACGGGATTGATGCTTCCACTGTAAGCCATTGCCAGTATGCGGTGCTGTA  
AACTGGGT(T/C)GACCTTACTCTCCACAGACTCTTTAGCATAAATGCCCGCAGCCATATCAT  
GAACACACGGTATGGCTAGCGCTTCAAACCTCCTTGCAAGACCATTTTTTGTTCACCAGATCG  
ACTCTTGAATACATTCCATTTTCATCCACAACCTCGTACTCTCCCTCTATGATGTGGTGGACA  
CCATATTCTGAACCCTCGCTAAAGTTTTTTTGCCAA

### DiploTSNP.220

AAATGTACGCCGTGCAATGCAAGATATTGATCTTGGTAGCAATGATGCTCCTTTTGTGCTAC  
CTGTTGATGTGGTGAATCGGGCTGCTGAAGAAAATATATTCATTCTGGTGGGGAGTCCAACG

ATGCCACGGAAACAGAATCTCAGAGGCATCATCTCTACGATGCCAAGAGTTTGGGGGTTA  
GAAGGGATTGTTTCGTGGGCAAATTATGGAAGGAAGAAGATTCCAATTCATCTTTCCAAGTGA  
GGAAT(T/C)GATGGACAACGTACTCAGACGTGGTCCGTGGGCTTATGCAGATAGGATGATCA  
CGCTTCAGAAGTGGACTCCGTTGATGGATTGGCTTTGTTGAACTTCATTCCTTTTTGGATTC  
AAGTTCGTGGGATACCTTTCCAGTACAATGAATCGTTAAGTGGTGATCAATATTGCAAGATT  
GATGGGGCAATACATCCAAGTGGATTACAATGAAGAACTTGTAGGGCGTTTGGAGTTTGTTT  
GTATCAGACTTAATTGG

#### DiploTSNP.270

AAATAGGTGGCTTATCAGTTTTTCACTCCACTTGTGTCAGGCACACATTATAAGCATCGA  
GTCACATGCCCTGACTCAGTTCTAATGAGTTTCGTCGTTCCGCTTACATCTATA  
AATATATTAAGTGACATCTCAATGTTTATTGCAAACCTAGTTTTTTTTTTCATAAGGCTTCTTT  
TC(A/G)AGTAGTTTGCACAAAGTAGAGAGTGAATAAAATATAATAGAATGTATGCATTAGTA  
GAATTTGACTTGGTTCTCCATTACAATGGCCACGCTGCATGTGCAATATCTTTCAAGAACGA  
AGGTGATGATGACGATGATGTAGTCTATGATTACGCTCCAGCTGCATGAGTCAATCATCTTT  
AGTTATGACGTCTTCACACCAGGAAGAGATAAGCTTTTCTAGCTAGCTAGATACAACCCT  
AATTAGCAATATATGTATTTTTAGCAATATATGTAT

#### DiploTSNP.290

CCACCTTAATGTGTGCTGAGCTGGATTAGTGTAAGATGAGTGATATATCAAAATTAAGTAG  
TGAAAATGTGCGAAAGAGATGCTATCGGCTTTTCATGAACCTTATTGTGTAATCAATCATAA  
AAGGCTTTACTGCACAATGTATACAAATTAGAAAGCTGATGAGAAGTAAACAATTTGCAAT  
ACAACTAAAGAACTGGTAAAGAAAAATAGTGGTCTTTGATATAGGAATCTACG(T/C)CGA  
TTATGTGCCCATCATATCCCCATCTGTTAATAACTTCAACACATCAGCTCATCGGTTAGAAC  
TGAGGACGTAACATCCTCGTCTTTTTTATCATTTGCAATTGCATTGTTACCGGCACATCAGC  
TCATCGGTTGTTCACTGATCCGAAATTATTATATACTGTACTACTTTTTTAAATGTCGGCAA  
GGAAATAGTCATCTGAATTATTTTATGGTTCAGAACT

#### DiploTSNP.448

GGTTTCTCTATAGTGCGGAGGGGTTTTGGATGGTTGCTCGACCTCATGAAATGCCGATCTGG  
AGGTTGATCTGGTTCTCGAGTTTGGCTGGATATGTGTCAGATCTACTTCGGAGAGTTTTCCA  
AAATGTCAAAGTGTCACTTCCTTTTCATTTCTGGATAGCTACACTGCATCCTCTTGTCTCCAT  
CTCTCTCATTTTTTCGGTTTTTTTCGT(A/C)GAGGTTTGAGGCTTTCATCAGGAACATCTTTGCTT  
ATCATTCTTGCAATAATTTAGCATGACGATTCTGCATGATTGGACTTCCTTTCAACTACCTCG  
GCTGTTTTTGGAGCTTTTGCCTCCTCTAATTTTTATAGTTCCAGAAGGAACATGACTGATGT  
TTTACTTTGCATTTTTTCTATTTTCTGAAGCTGTAGTCATTTATGAATGTTTTTCTCGAGTGAAG  
GGACCGATGTTGAGTGCTTAAACCTCTTCA
