# Supplementary material for: Assessment of Wild Rocket (Diplotaxis tenuifolia (L.) DC.) Germplasm Accessions by NGS Identified SSR and SNP Markers
Source: MDPI journal article supplement (doi:10.3390/plants11243482), 2022-12-12
Supplement: s1 [file s1]

**Table S4.** Molecular fingerprints of the 90 accessions (SSR and SNP/CAPS markers)

| ACCESSIONS | MT317577.1 | MT317527.1 | MT317610.1 | MT317537.1 | MT317823.1 | Diplo.TSNP.045 | Diplo.TSNP.062 | Diplo.TSNP.090 | Diplo.TSNP.138 | Diplo.TSNP.213 | Diplo.TSNP.220 | Diplo.TSNP.270 | Diplo.TSNP.290 | Diplo.TSNP.448 | ACCESSIONS | MT317577.1 | MT317527.1 | MT317610.1 | MT317537.1 | MT317823.1 | Diplo.TSNP.045 | Diplo.TSNP.062 | Diplo.TSNP.090 | Diplo.TSNP.138 | Diplo.TSNP.213 | Diplo.TSNP.220 | Diplo.TSNP.270 | Diplo.TSNP.290 | Diplo.TSNP.448 |
|------------|------------|------------|------------|------------|------------|----------------|----------------|----------------|----------------|----------------|----------------|----------------|----------------|----------------|------------|------------|------------|------------|------------|------------|----------------|----------------|----------------|----------------|----------------|----------------|----------------|----------------|----------------|
| 1          | 248:248    | 179:181    | 157:157    | 163:175    | 182:184    | Y/Y            | Y/Y            | Y/Y            | Y/Y            | Y/Y            | Y/N            | N/N            | Y/N            | N/N            | 58         | 242:246    | 179:181    | 157:157    | 163:175    | 184:188    | Y/Y            | Y/Y            | Y/Y            | Y/Y            | Y/N            | Y/N            | Y/N            | Y/N            | N/N            |
| 3          | 242:248    | 179:181    | 157:157    | 163:175    | 182:184    | Y/Y            | Y/Y            | Y/Y            | Y/Y            | Y/N            | Y/N            | N/N            | Y/Y            | N/N            | 59         | 242:252    | 173:181    | 157:157    | 163:171    | 184:188    | Y/Y            | Y/Y            | Y/Y            | Y/Y            | Y/Y            | Y/Y            | N/N            | Y/N            | N/N            |
| 4          | 242:248    | 179:181    | 157:157    | 163:175    | 182:184    | Y/Y            | Y/Y            | Y/Y            | Y/Y            | Y/Y            | N/N            | N/N            | Y/N            | N/N            | 60         | 242:242    | 167:173    | 157:175    | 163:171    | 184:188    | Y/Y            | Y/Y            | Y/Y            | Y/Y            | Y/N            | Y/Y            | N/N            | Y/N            | N/N            |
| 5          | 242:252    | 173:181    | 157:157    | 163:175    | 184:188    | Y/Y            | Y/Y            | Y/Y            | Y/Y            | Y/Y            | N/N            | N/N            | Y/N            | N/N            | 61         | 242:246    | 173:181    | 157:157    | 163:171    | 184:188    | Y/Y            | Y/Y            | Y/Y            | Y/Y            | Y/Y            | Y/Y            | N/N            | N/N            | N/N            |
| 6          | 242:242    | 173:181    | 157:157    | 163:175    | 182:184    | Y/Y            | Y/Y            | Y/N            | Y/N            | Y/Y            | Y/Y            | N/N            | N/N            | N/N            | 63         | 242:252    | 173:181    | 157:157    | 163:173    | 182:184    | Y/Y            | Y/Y            | Y/Y            | Y/Y            | Y/Y            | Y/Y            | N/N            | Y/N            | N/N            |
| 7          | 242:242    | 173:181    | 157:157    | 163:175    | 182:184    | Y/N            | Y/Y            | Y/Y            | Y/N            | Y/Y            | Y/Y            | N/N            | Y/N            | N/N            | 64         | 242:242    | 161:173    | 157:157    | 163:175    | 182:184    | Y/Y            | Y/Y            | Y/Y            | Y/Y            | Y/Y            | Y/Y            | N/N            | Y/N            | N/N            |
| 8          | 244:248    | 173:179    | 157:157    | 163:171    | 182:184    | Y/N            | Y/Y            | Y/N            | Y/N            | Y/Y            | Y/Y            | N/N            | N/N            | N/N            | 65         | 242:242    | 167:181    | 157:175    | 163:171    | 182:184    | Y/Y            | Y/Y            | Y/Y            | Y/Y            | Y/Y            | Y/Y            | N/N            | Y/N            | N/N            |
| 9          | 242:242    | 179:181    | 157:157    | 163:171    | 182:184    | Y/Y            | Y/Y            | Y/N            | Y/Y            | Y/Y            | Y/N            | N/N            | N/N            | N/N            | 68         | X          | 170:170    | 157:157    | 168:300    | X          | Y/Y            | X              | X              | X              | X              | X              | X              | X              | X              |
| 10         | 248:248    | 173:181    | 157:157    | 163:171    | 186:188    | Y/Y            | Y/Y            | Y/N            | N/N            | Y/Y            | Y/Y            | N/N            | Y/N            | N/N            | 69         | 238:248    | 171:173    | 157:157    | 163:171    | 184:188    | Y/Y            | Y/Y            | Y/N            | Y/N            | Y/N            | Y/N            | N/N            | Y/N            | N/N            |
| 12         | 242:252    | 173:179    | 157:157    | 163:171    | 182:184    | Y/Y            | Y/Y            | Y/Y            | Y/Y            | Y/Y            | Y/Y            | N/N            | Y/N            | N/N            | 72         | 246:248    | 173:173    | 157:157    | 163:175    | 182:184    | Y/Y            | Y/Y            | Y/N            | Y/N            | Y/N            | Y/Y            | N/N            | Y/N            | N/N            |
| 15         | 248:248    | 179:181    | 157:157    | 163:175    | 184:188    | Y/Y            | Y/Y            | Y/Y            | Y/Y            | Y/Y            | Y/Y            | N/N            | N/N            | N/N            | 73         | 250:252    | 161:181    | 157:157    | 163:175    | 182:184    | Y/Y            | Y/Y            | Y/Y            | Y/Y            | Y/N            | N/N            | Y/N            | Y/N            | N/N            |
| 16         | 248:248    | 173:181    | 157:157    | 163:175    | 156:188    | Y/Y            | Y/Y            | Y/N            | N/N            | Y/Y            | Y/N            | N/N            | Y/N            | Y/N            | 74         | 242:242    | 173:181    | 157:157    | 163:175    | 182:184    | Y/Y            | Y/Y            | Y/Y            | Y/N            | Y/Y            | Y/Y            | N/N            | N/N            | N/N            |
| 17         | 244:244    | 173:181    | 157:157    | 163:171    | 156:184    | Y/Y            | Y/Y            | Y/N            | Y/N            | Y/Y            | Y/N            | N/N            | Y/N            | N/N            | 81         | 242:246    | 173:181    | 157:157    | 163:175    | 182:184    | Y/Y            | Y/Y            | Y/N            | Y/Y            | Y/Y            | Y/Y            | N/N            | Y/N            | N/N            |
| 18         | 248:248    | 173:173    | 157:157    | 163:175    | 156:156    | Y/Y            | Y/Y            | Y/Y            | N/N            | Y/Y            | Y/N            | N/N            | Y/N            | Y/N            | 84         | 242:244    | 161:181    | 157:157    | 163:175    | 182:184    | Y/Y            | Y/Y            | Y/Y            | Y/Y            | Y/N            | Y/Y            | N/N            | Y/N            | N/N            |
| 19         | 248:248    | 173:181    | 157:157    | 163:171    | 156:188    | Y/Y            | Y/Y            | Y/N            | Y/N            | Y/Y            | Y/Y            | N/N            | Y/N            | N/N            | 91         | X          | 173:179    | 157:157    | 163:175    | 182:184    | Y/Y            | Y/Y            | Y/N            | Y/Y            | Y/Y            | Y/Y            | N/N            | Y/Y            | N/N            |
| 20         | 242:248    | 177:179    | 157:157    | 163:175    | 182:184    | Y/Y            | Y/Y            | Y/Y            | Y/Y            | Y/N            | Y/N            | N/N            | N/N            | Y/N            | 92         | X          | 161:173    | 157:157    | 163:173    | 186:188    | Y/Y            | Y/Y            | Y/Y            | Y/Y            | Y/Y            | Y/Y            | N/N            | Y/N            | N/N            |
| 21         | 238:242    | 161:167    | 157:157    | 163:171    | 184:188    | Y/Y            | Y/Y            | Y/Y            | Y/Y            | Y/N            | Y/N            | N/N            | N/N            | Y/N            | 97         | X          | 177:179    | 157:157    | 163:173    | 156:184    | Y/Y            | Y/Y            | Y/Y            | Y/Y            | Y/N            | N/N            | N/N            | N/N            | N/N            |
| 22         | 238:238    | 161:167    | 157:157    | 163:171    | 184:188    | Y/N            | Y/Y            | Y/Y            | Y/Y            | Y/N            | Y/Y            | N/N            | Y/N            | Y/N            | 98         | 242:248    | 179:181    | 157:157    | 163:175    | 182:184    | Y/Y            | Y/Y            | Y/Y            | Y/Y            | Y/Y            | Y/N            | N/N            | Y/N            | N/N            |
| 23         | 238:238    | 171:173    | 157:157    | 163:175    | 186:188    | Y/Y            | Y/Y            | Y/Y            | Y/Y            | Y/Y            | Y/N            | N/N            | Y/N            | Y/N            | 99         | 248:248    | 179:181    | 157:157    | 163:175    | 182:184    | Y/Y            | Y/Y            | Y/Y            | Y/Y            | Y/N            | N/N            | Y/N            | Y/N            | N/N            |
| 24         | 244:244    | 173:181    | 157:157    | 163:171    | 156:184    | Y/Y            | Y/Y            | Y/Y            | Y/N            | Y/Y            | Y/N            | N/N            | Y/N            | N/N            | 100        | 248:248    | 173:181    | 157:175    | 163:175    | 182:184    | Y/Y            | Y/Y            | Y/Y            | Y/Y            | Y/Y            | N/N            | N/N            | N/N            | N/N            |
| 26         | 242:242    | 179:181    | 157:157    | 163:175    | 211:213    | Y/Y            | Y/Y            | Y/Y            | Y/Y            | N/N            | Y/N            | N/N            | Y/N            | N/N            | 101        | 248:248    | 177:179    | 157:157    | 163:175    | 182:184    | Y/Y            | Y/Y            | Y/Y            | Y/Y            | N/N            | Y/N            | N/N            | N/N            | N/N            |
| 27         | 242:248    | 173:181    | 157:157    | 163:171    | 182:184    | Y/Y            | Y/Y            | Y/N            | Y/Y            | Y/Y            | Y/N            | N/N            | Y/N            | N/N            | 102        | 242:248    | 179:181    | 157:157    | 163:175    | 182:184    | Y/Y            | Y/Y            | Y/Y            | Y/Y            | Y/N            | Y/N            | N/N            | Y/N            | N/N            |
| 29         | X          | 173:170    | 135:157    | 167:171    | X          | Y/Y            | X              | X              | X              | X              | X              | X              | X              | X              | 103        | 242:242    | 173:181    | 157:171    | 163:175    | 182:184    | Y/Y            | Y/Y            | Y/Y            | Y/Y            | Y/N            | Y/N            | N/N            | Y/N            | N/N            |
| 32         | 242:248    | 177:181    | 157:157    | 163:175    | 184:188    | Y/Y            | Y/Y            | Y/Y            | Y/Y            | Y/N            | Y/Y            | N/N            | Y/N            | N/N            | 104        | 242:242    | 173:177    | 157:157    | 163:171    | 182:184    | Y/Y            | Y/Y            | Y/Y            | Y/Y            | Y/N            | Y/N            | N/N            | Y/N            | N/N            |
| 35         | 242:242    | 179:179    | 157:157    | 163:175    | 184:188    | Y/Y            | Y/Y            | Y/Y            | Y/Y            | Y/N            | Y/N            | N/N            | N/N            | N/N            | 105        | X          | 162:170    | 135:157    | 172:300    | X          | Y/Y            | X              | X              | X              | X              | X              | X              | X              | X              |
| 36         | 248:248    | 167:179    | 157:157    | 163:175    | 182:184    | Y/Y            | Y/Y            | Y/N            | Y/Y            | Y/Y            | Y/N            | N/N            | N/N            | N/N            | 134        | X          | 173:179    | 157:157    | 163:171    | 184:188    | Y/Y            | Y/Y            | Y/Y            | Y/Y            | Y/Y            | Y/N            | N/N            | Y/Y            | N/N            |
| 37         | 242:248    | 179:181    | 157:157    | 163:175    | 182:184    | Y/Y            | Y/Y            | Y/Y            | Y/Y            | Y/N            | Y/N            | N/N            | Y/N            | N/N            | 146        | X          | 173:179    | 157:157    | 163:177    | 211:213    | Y/Y            | Y/Y            | Y/N            | Y/Y            | Y/N            | Y/Y            | N/N            | N/N            | N/N            |
| 38         | 238:238    | 171:173    | 157:157    | 163:171    | 186:188    | Y/Y            | Y/Y            | Y/Y            | Y/Y            | Y/Y            | Y/N            | N/N            | Y/N            | Y/N            | 152        | 238:248    | 173:181    | 157:173    | 163:175    | 182:184    | Y/Y            | Y/Y            | Y/Y            | Y/Y            | Y/Y            | Y/Y            | N/N            | Y/N            | N/N            |
| 39         | 238:242    | 167:167    | 157:157    | 163:171    | 184:188    | Y/Y            | Y/Y            | Y/Y            | Y/Y            | Y/N            | Y/Y            | N/N            | N/N            | N/N            | 154        | 240:242    | 161:173    | 157:157    | 163:171    | 182:184    | Y/Y            | Y/Y            | Y/Y            | Y/Y            | Y/N            | Y/N            | N/N            | Y/N            | N/N            |
| 40         | 244:244    | 173:179    | 157:157    | 163:171    | 182:184    | Y/Y            | Y/Y            | Y/N            | Y/N            | Y/Y            | Y/Y            | N/N            | Y/N            | N/N            | 155        | 248:248    | 179:181    | 157:173    | 163:171    | 182:184    | Y/Y            | Y/Y            | Y/Y            | Y/Y            | Y/N            | Y/Y            | N/N            | N/N            | Y/N            |
| 41         | 238:242    | 173:179    | 157:157    | 163:175    | 182:184    | Y/Y            | Y/Y            | Y/N            | Y/Y            | Y/Y            | Y/N            | N/N            | N/N            | N/N            | 156        | 242:242    | 177:179    | 157:171    | 163:175    | 184:188    | Y/Y            | Y/Y            | Y/Y            | Y/Y            | Y/Y            | Y/Y            | N/N            | Y/N            | N/N            |
| 42         | 246:248    | 173:181    | 157:157    | 163:175    | 184:188    | Y/Y            | Y/Y            | Y/Y            | Y/Y            | Y/Y            | Y/N            | N/N            | N/N            | N/N            | 157        | 242:242    | 173:179    | 157:157    | 163:175    | 182:184    | Y/Y            | Y/Y            | Y/Y            | Y/Y            | Y/N            | Y/Y            | N/N            | Y/N            | N/N            |
| 43         | 242:246    | 173:181    | 157:157    | 163:175    | 182:184    | Y/Y            | Y/Y            | Y/N            | Y/Y            | Y/Y            | Y/N            | N/N            | Y/N            | N/N            | 158        | 238:238    | 171:173    | 157:157    | 163:171    | 186:188    | Y/Y            | Y/Y            | Y/Y            | Y/Y            | Y/Y            | Y/N            | N/N            | N/N            | Y/N            |
| 44         | 240:248    | 173:181    | 157:157    | 163:175    | 182:184    | Y/Y            | Y/Y            | Y/N            | Y/Y            | Y/Y            | Y/N            | N/N            | N/N            | N/N            | 159        | 242:242    | 171:179    | 157:157    | 163:171    | 186:186    | Y/Y            | Y/Y            | Y/Y            | Y/Y            | Y/Y            | Y/N            | N/N            | N/N            | N/N            |
| 45         | 246:248    | 173:181    | 157:157    | 163:175    | 182:184    | Y/Y            | Y/Y            | Y/Y            | Y/Y            | Y/N            | Y/N            | N/N            | N/N            | N/N            | 160        | 248:248    | 179:181    | 157:157    | 163:175    | 182:184    | Y/Y            | Y/Y            | Y/Y            | Y/Y            | Y/N            | Y/Y            | N/N            | Y/N            | N/N            |
| 46         | 242:248    | 173:179    | 157:157    | 163:175    | 182:184    | Y/Y            | Y/Y            | Y/N            | Y/Y            | Y/Y            | Y/N            | N/N            | Y/N            | N/N            | 161        | 248:248    | 179:181    | 157:157    | 163:175    | 182:184    | Y/Y            | Y/Y            | Y/Y            | Y/Y            | Y/N            | Y/Y            | N/N            | Y/N            | N/N            |
| 47         | 242:246    | 161:181    | 157:157    | 163:171    | 182:184    | Y/Y            | Y/Y            | Y/N            | Y/Y            | Y/Y            | Y/N            | N/N            | Y/N            | N/N            | 162        | 242:248    | 177:181    | 157:157    | 163:175    | 182:184    | Y/Y            | Y/Y            | Y/Y            | Y/Y            | Y/N            | N/N            | N/N            | Y/N            | N/N            |
| 48         | 242:242    | 179:181    | 157:157    | 163:175    | 184:188    | Y/Y            | Y/Y            | Y/N            | Y/N            | Y/N            | Y/N            | N/N            | N/N            | N/N            | 163        | 242:242    | 179:181    | 157:157    | 163:171    | 182:184    | Y/Y            | Y/Y            | Y/Y            | Y/Y            | Y/N            | Y/Y            | N/N            | N/N            | N/N            |
| 49         | 242:246    | 173:179    | 157:175    | 163:175    | 184:188    | Y/Y            | Y/Y            | Y/Y            | Y/Y            | Y/Y            | Y/N            | N/N            | N/N            | N/N            | 164        | 238:238    | 167:167    | 157:157    | 163:171    | 186:188    | Y/Y            | Y/Y            | Y/Y            | Y/Y            | Y/N            | Y/Y            | N/N            | N/N            | N/N            |
| 51         | 242:252    | 179:181    | 157:173    | 163:177    | 182:184    | Y/Y            | Y/Y            | Y/N            | Y/Y            | Y/Y            | Y/N            | N/N            | Y/N            | N/N            | 165        | 248:248    | 173:173    | 157:157    | 163:175    | 156:188    | Y/Y            | Y/Y            | Y/N            | N/N            | Y/Y            | Y/Y            | N/N            | N/N            |                |
