# Supplementary material for: Assessment of Wild Rocket (Diplotaxis tenuifolia (L.) DC.) Germplasm Accessions by NGS Identified SSR and SNP Markers
Source: MDPI journal article supplement (doi:10.3390/plants11243482), 2022-12-12
Supplement: s1 [file s1]

**Table SM1.** Twenty tested SSR Loci

| Locus    | Sequence                                          | Locus    | Sequence                                        |
|----------|---------------------------------------------------|----------|-------------------------------------------------|
| MT317459 | FW CCTTTGATCTCACCAGTC<br>RV AGCAGCAGTAATAGTGGA    | MT317571 | FW CTTGCTGTTTGAAGTTTGC<br>RV CGTAGCAATGACTTGCC  |
| MT317469 | FW GCGTATGTCACCAAAGAT<br>RV CTGTGAGTAGCTGGGAA     | MT317762 | FW CACAAGAGGCAACAGAA<br>RV GCCTCATTTCATGTTACCTC |
| MT317471 | FW CATTGATTGTCCCTAAGCT<br>RV ATGCTAGGGCTCATAAGT   | MT317541 | FW GTGTGGGAGCATTTCAC<br>RV CCTGGTGTTCTTTGCAG    |
| MT317520 | FW CCTTAATAGCCACCTGC<br>RV TTCTCTGCAACATCTGTG     | MT317527 | FW ACTTTGACGAAACGAAGC<br>RV CTCAGAACCAAAGAGAAGC |
| MT317482 | FW CACCACGCAGACAATATG<br>RV CATATCCGTGGGTAAGGA    | MT317537 | FW CAGCTTTCTGTTAGTGGTC<br>RV CCAACCAAAAACGTCAGA |
| MT317461 | FW TGAACCTGTTAAGACTCCA<br>RV CTCCAAAACATACCTAGACC | MT317610 | FW GTCTATTGATCTGATGCCG<br>RV GCGAGAACCGATCTATGA |
| MT317478 | FW CGATGTCTTATCCATGAGC<br>RV TTGCAGAGTGATGGGAA    | MT317613 | FW GTAATAAAGCGACCCTGC<br>RV CTGGTGGGAAGGTATCA   |
| MT317577 | FW CGGATAAACATATCCGCTT<br>RV GGTTAACATCACTAACGGT  | MT317734 | FW GACTAACTCTGTGTGTGC<br>RV TTAATTCAGTTCCAGGCG  |
| MT317578 | FW GCTGAACAAACCATACGA<br>RV TCTAACTACGATCAGGACAG  | MT317741 | FW CAAGTAATTCAGTCTCGGG<br>RV GGTAAGCAGGGTCTTG   |
| MT317582 | FW GCAAACAAAGCCAATCC<br>RV CTTCTCGTCTTCTTCAGGA    | MT317823 | FW CCAACATAGAAAGGTGCG<br>RV GAGTTCCTCCAAAAGCTG  |
